# Supplementary material for: A Changing Gastric Environment Leads to Adaptation of Lipopolysaccharide Variants in Helicobacter pylori Populations during Colonization
Source: PubMed Central journal article supplement (PMC2690825; doi:10.1371/journal.pone.0005885), 2009-06-11
Supplement: pone.0005885.s002.pdf [file pone.0005885.s002.pdf]

Kx201

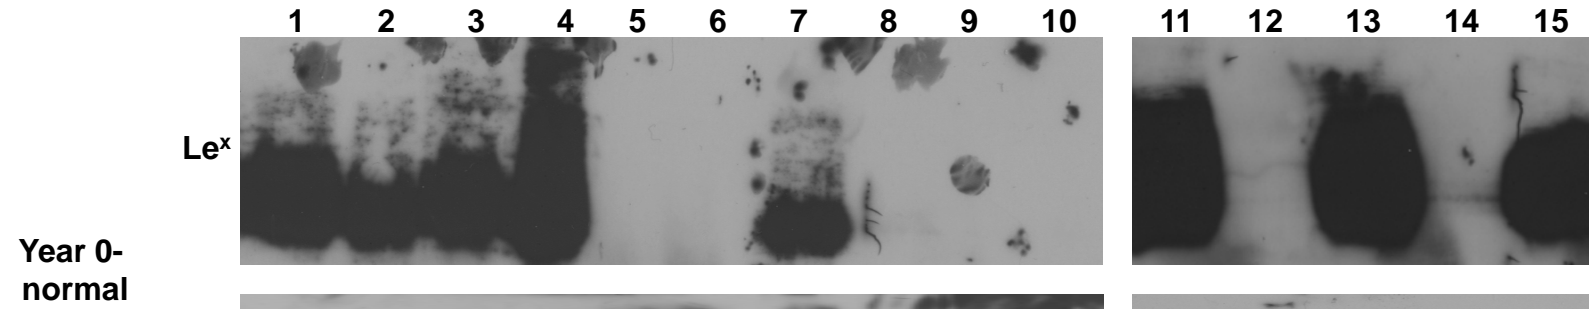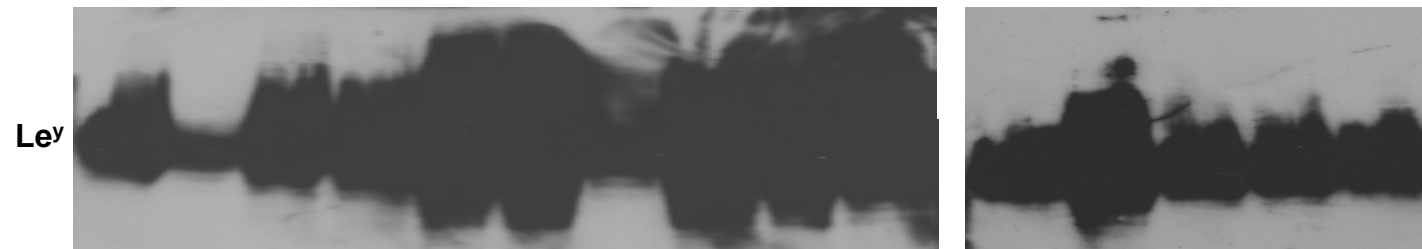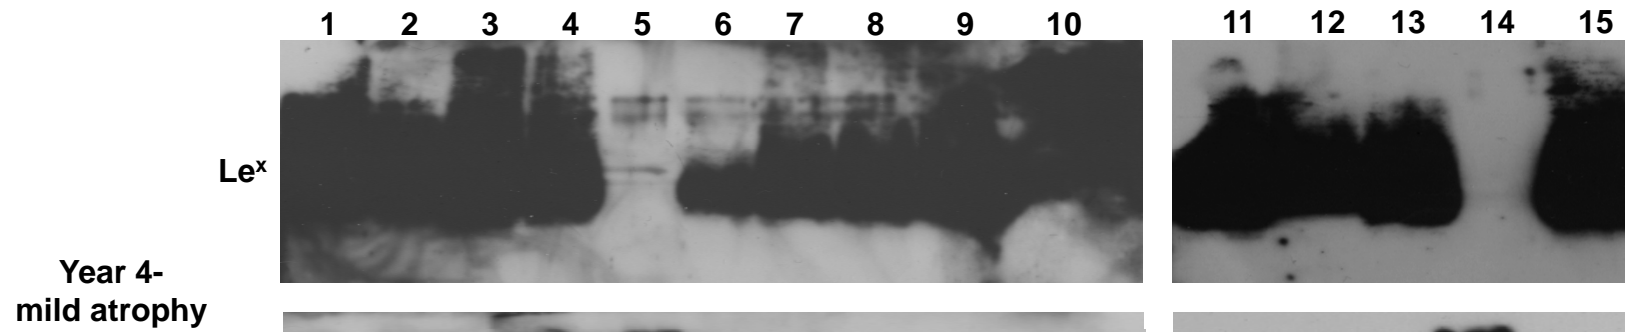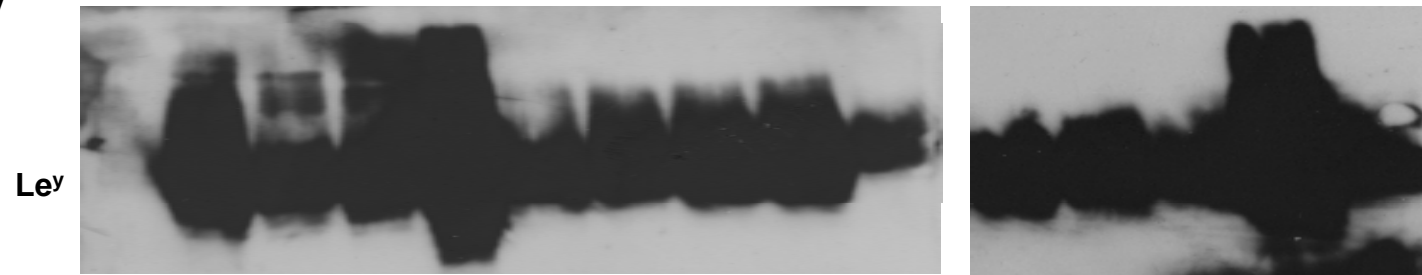

Kx208

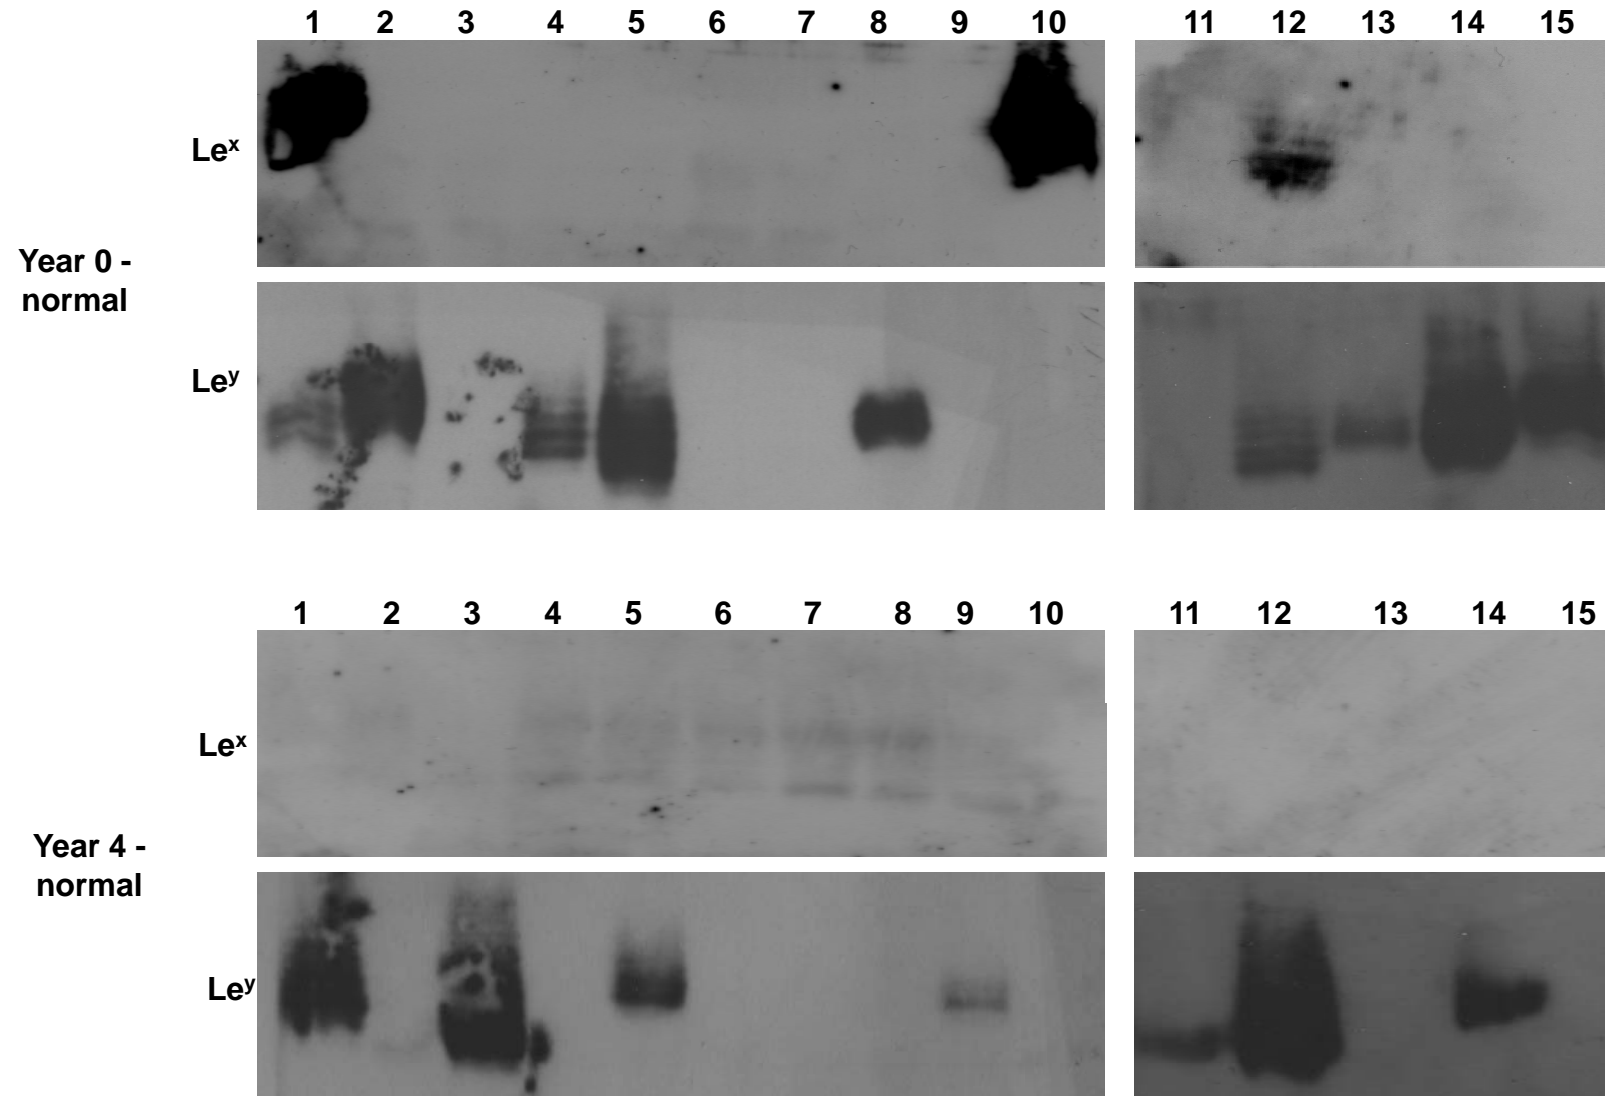

Kx239

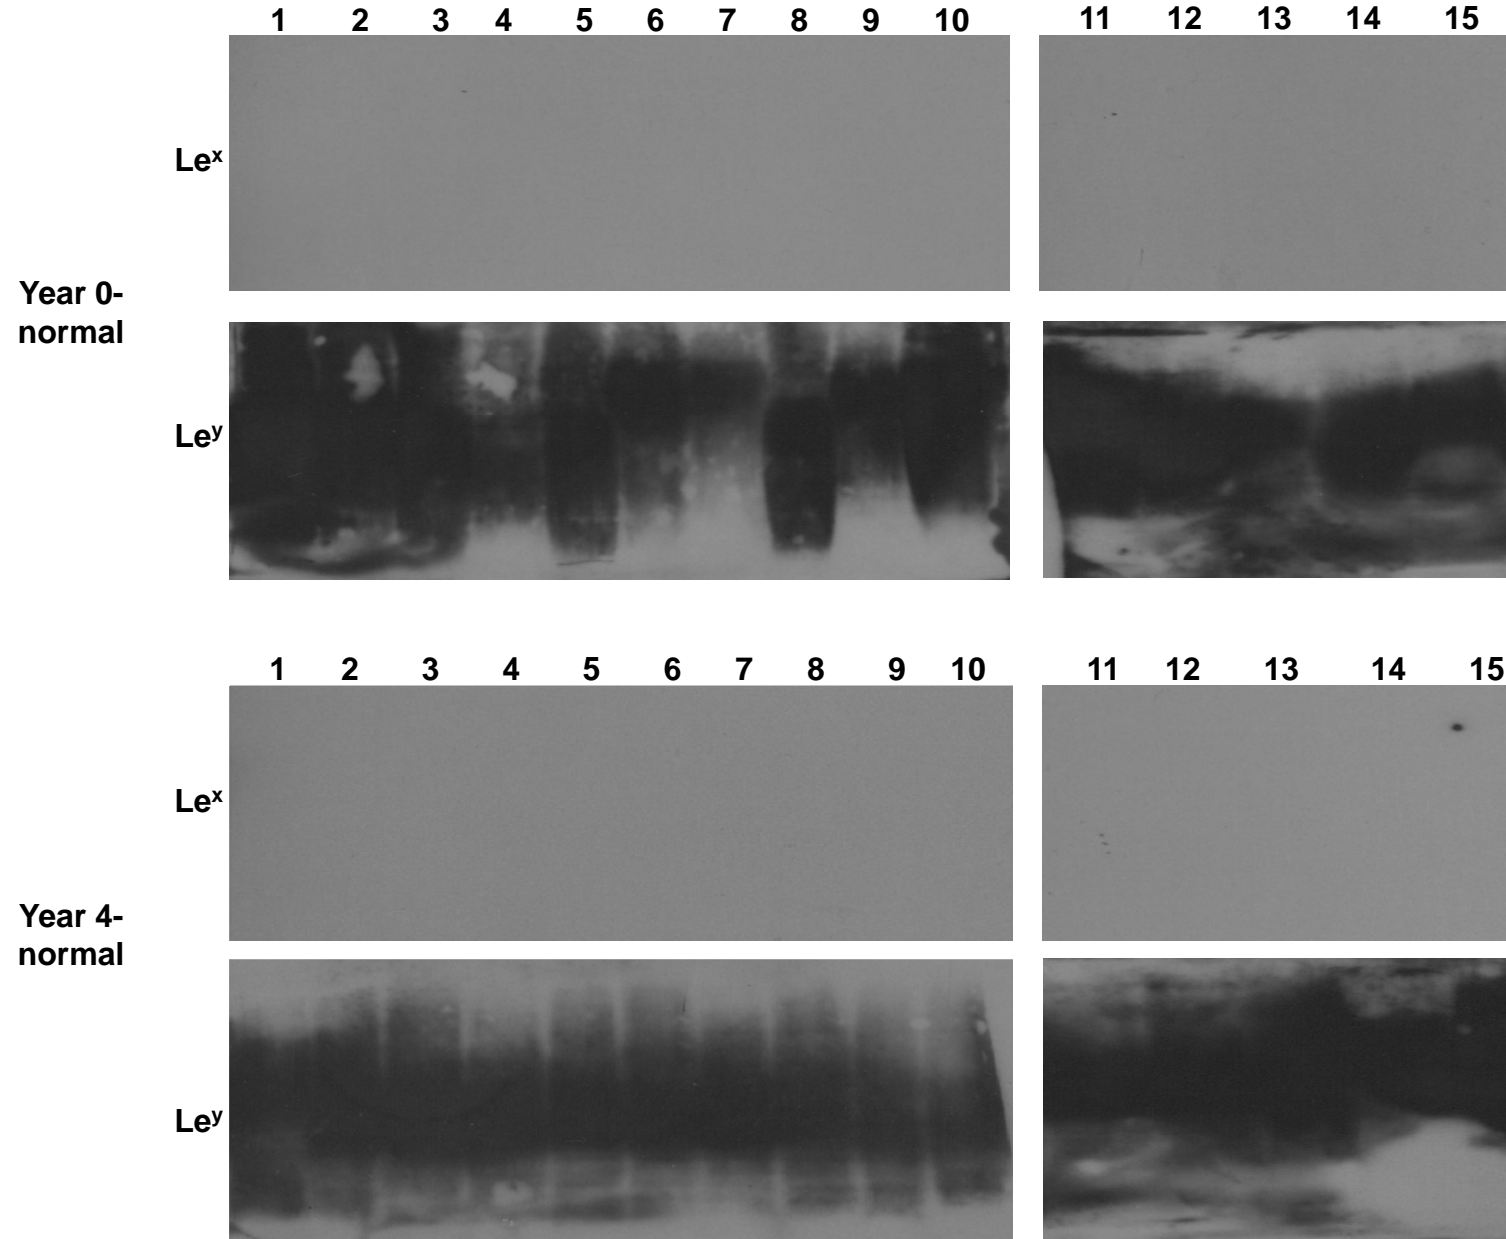



Kx439

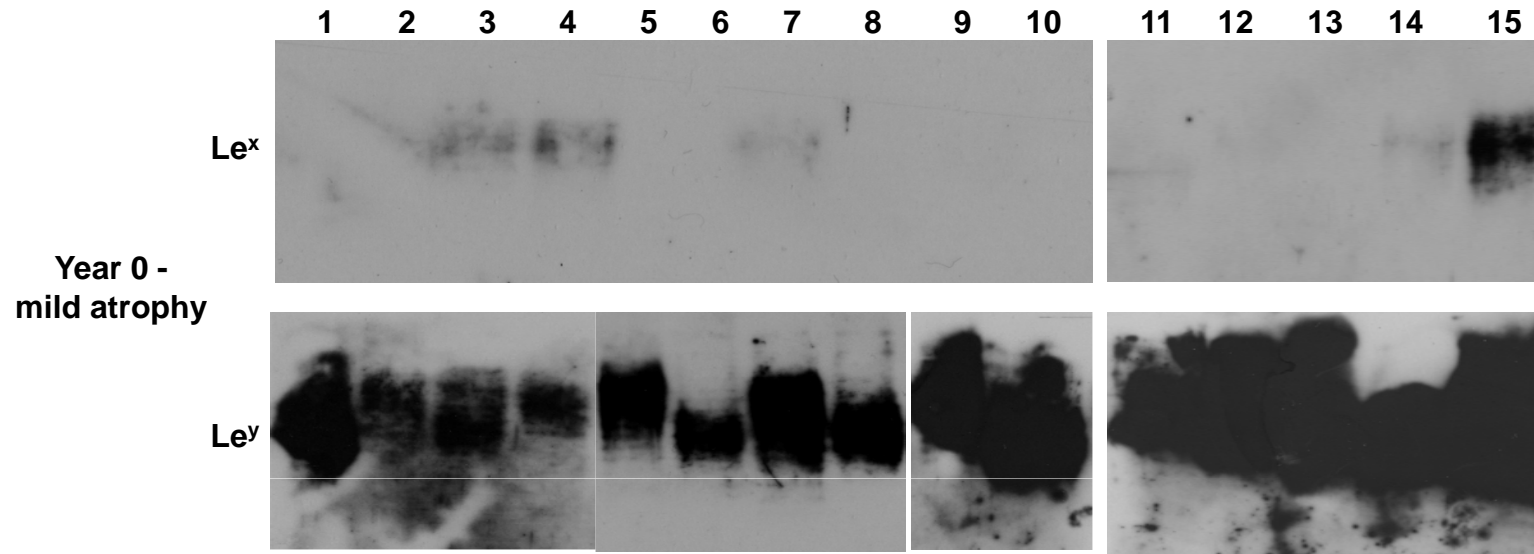

Year 4 -  
high grade atrophy

No isolates available from year 4

Kx491

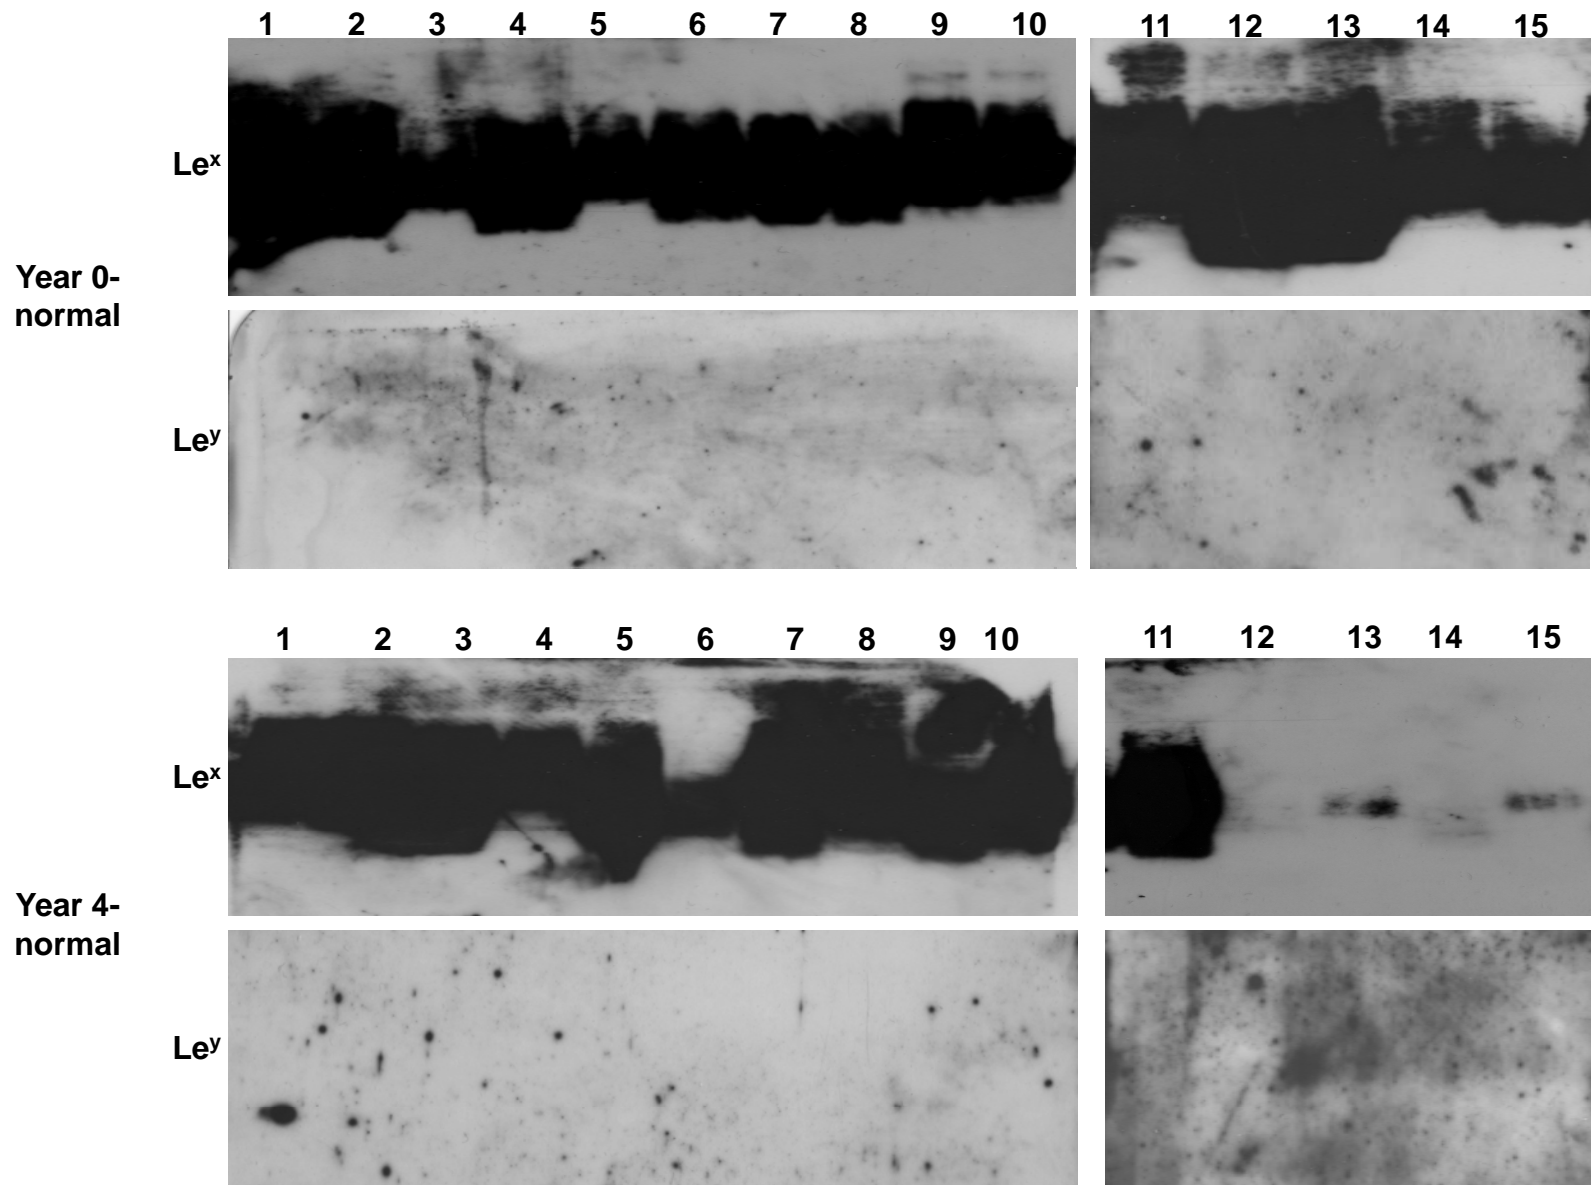

Kx533

1 2 3 4 5 6 7 8 9 10 11 12 13 14 15

Le<sup>x</sup>

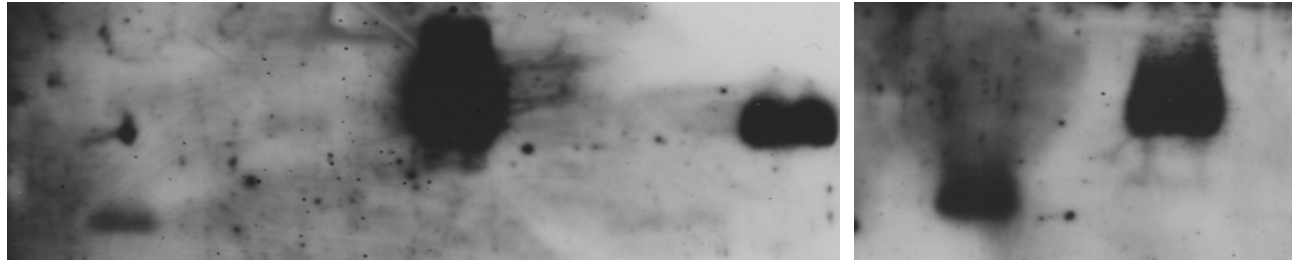

Year 0 -  
moderate atrophy

Le<sup>y</sup>

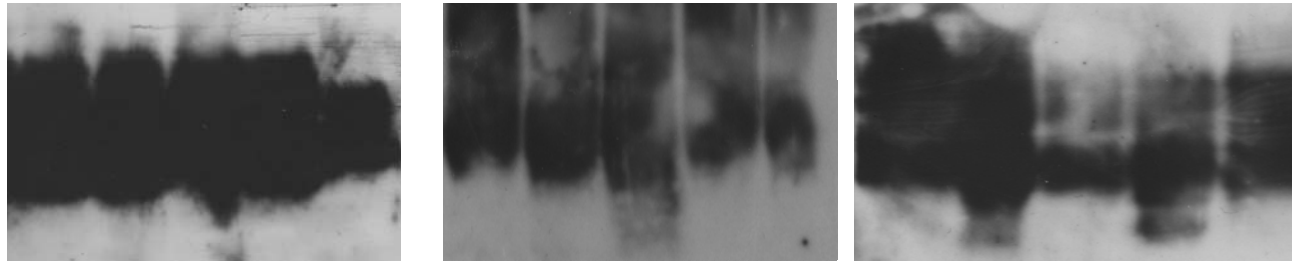

1 2 3 4 5 6 7 8 9 10 11 12 13 14 15

Le<sup>x</sup>

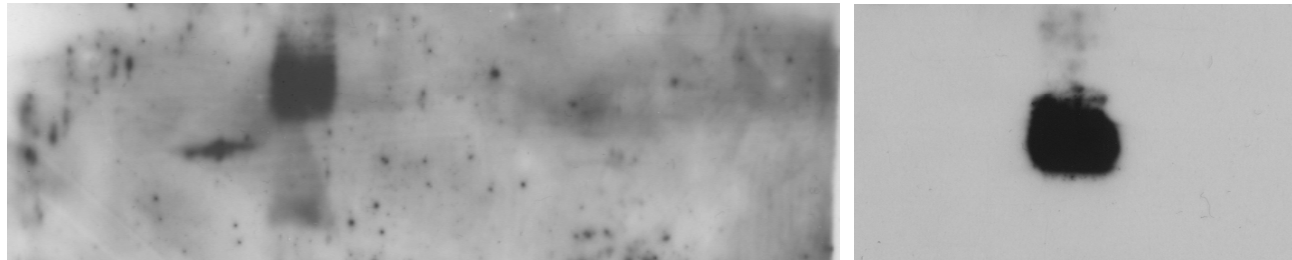

Year 4 -  
high grade atrophy

Le<sup>y</sup>

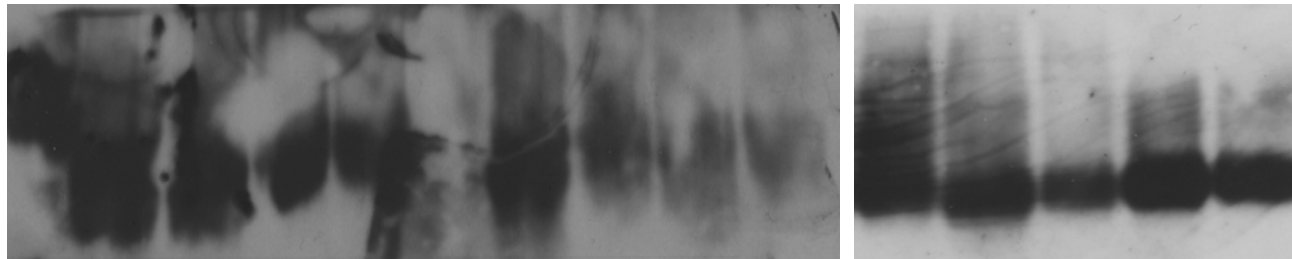





Kx595

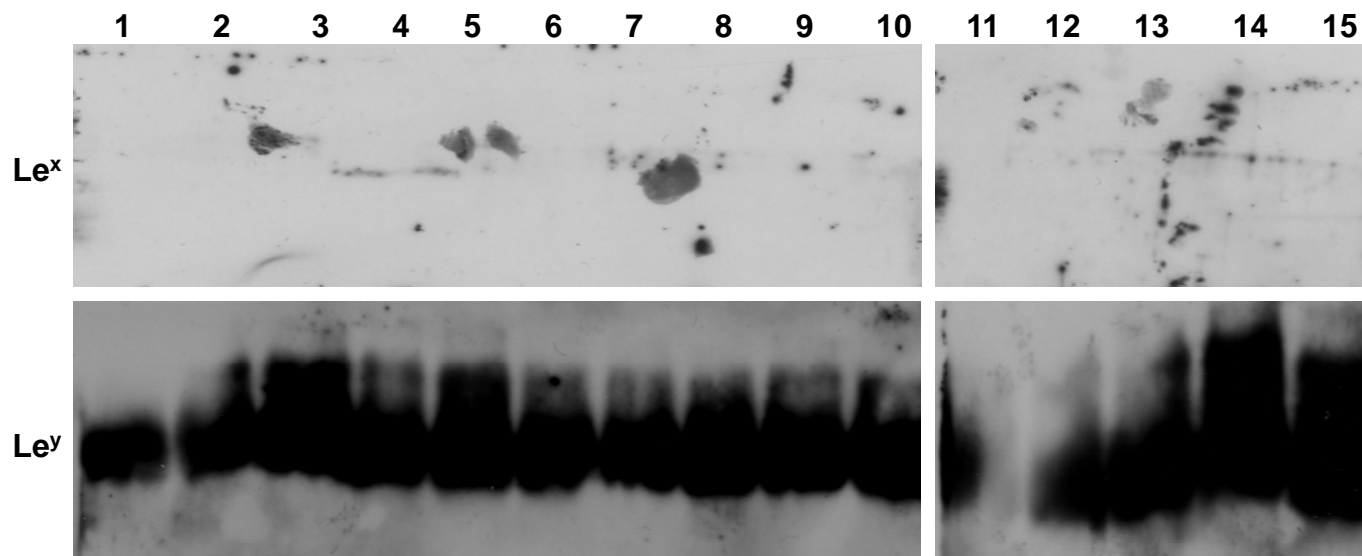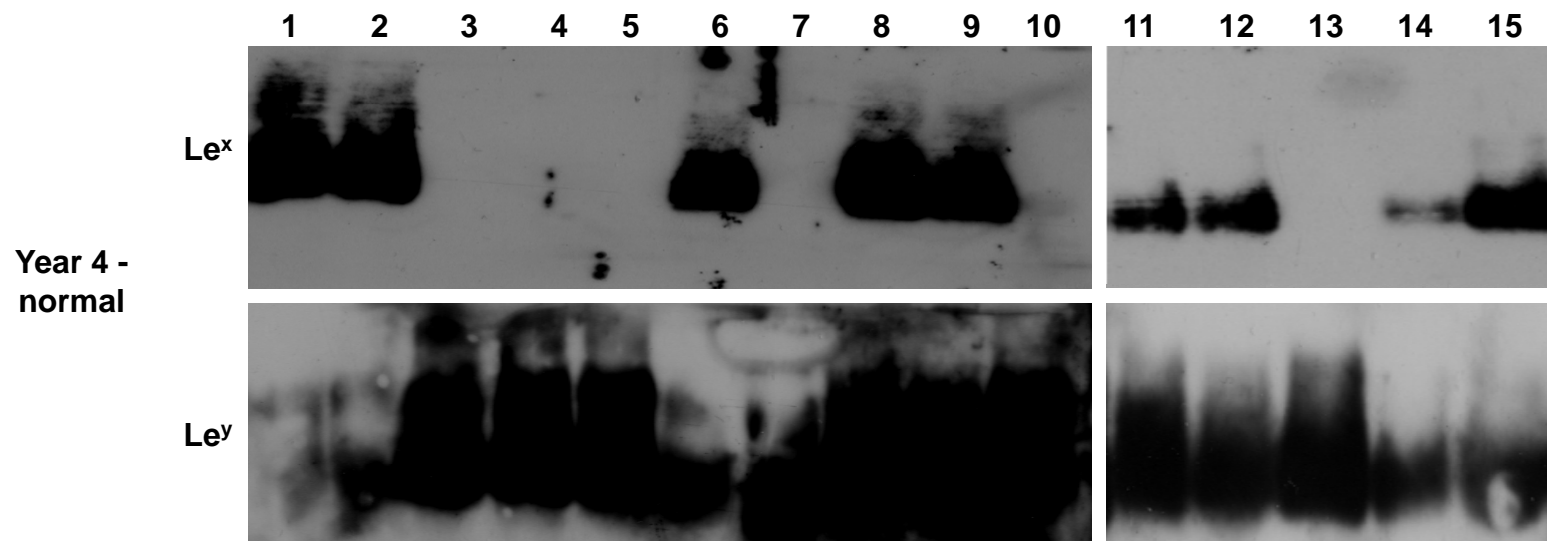

Kx1039

1 2 3 4 5 6 7 8 9 10

11 12 13 14 15

Le<sup>x</sup>

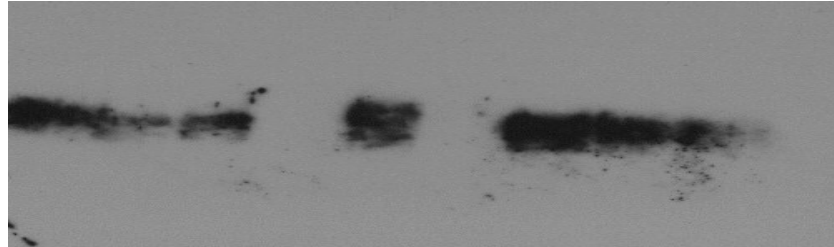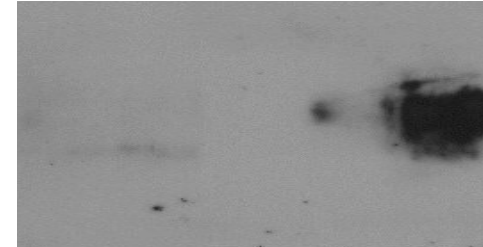

Year 0 -  
slight atrophy

Le<sup>y</sup>

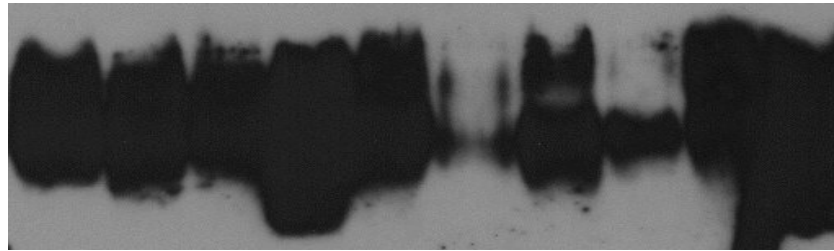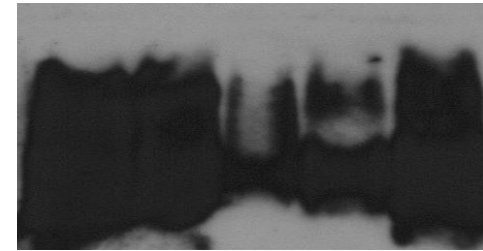

1 2 3 4 5 6 7 8 9 10

11 12 13 14 15

Le<sup>x</sup>

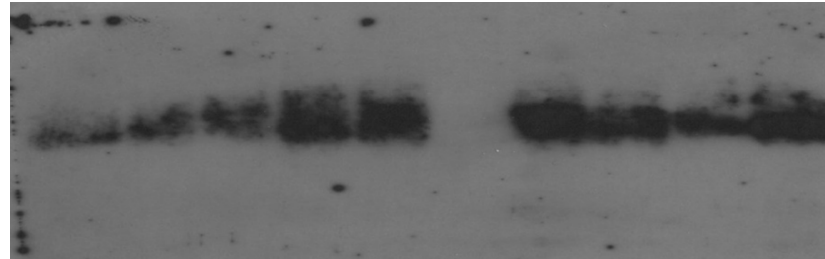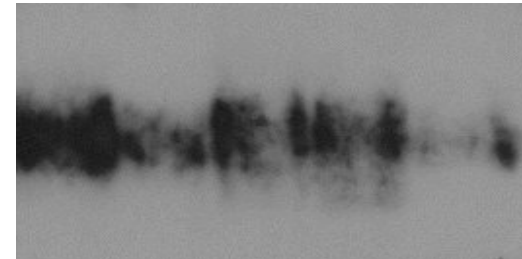

Year 4 -  
high grade atrophy

Le<sup>y</sup>

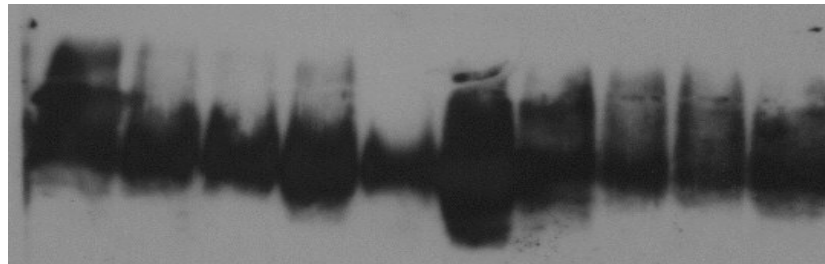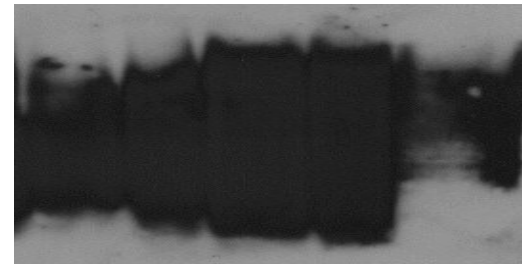

**Kx1167**

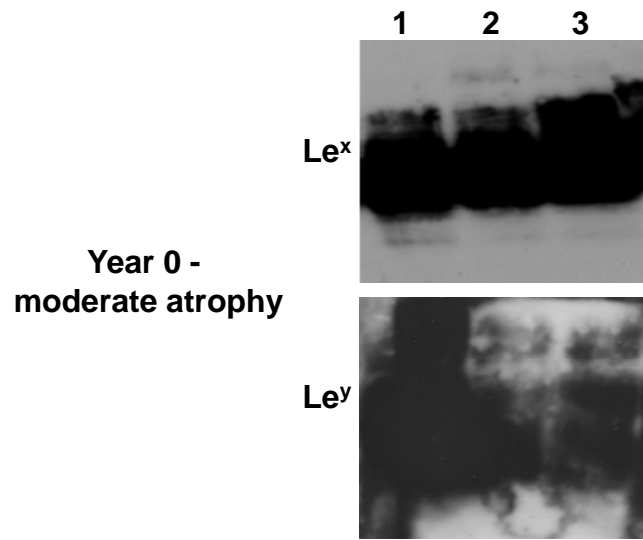

Only 3 isolates available from year 0

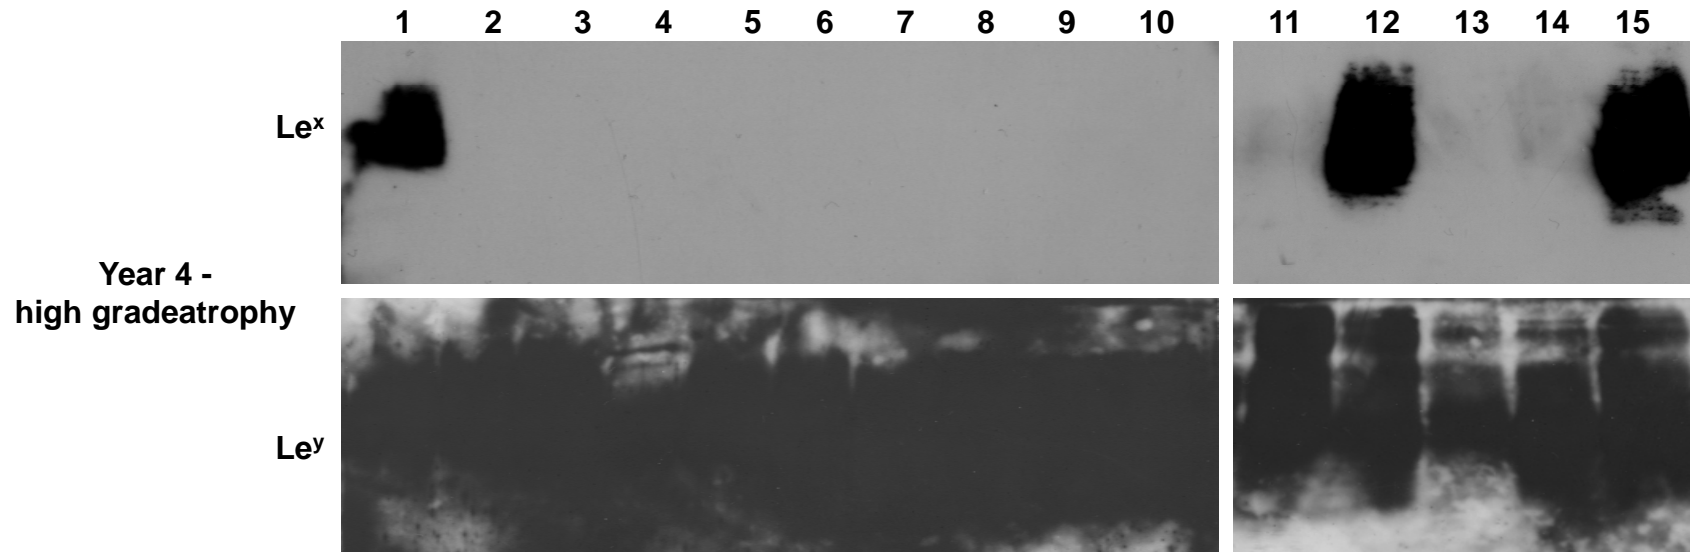

Kx1172

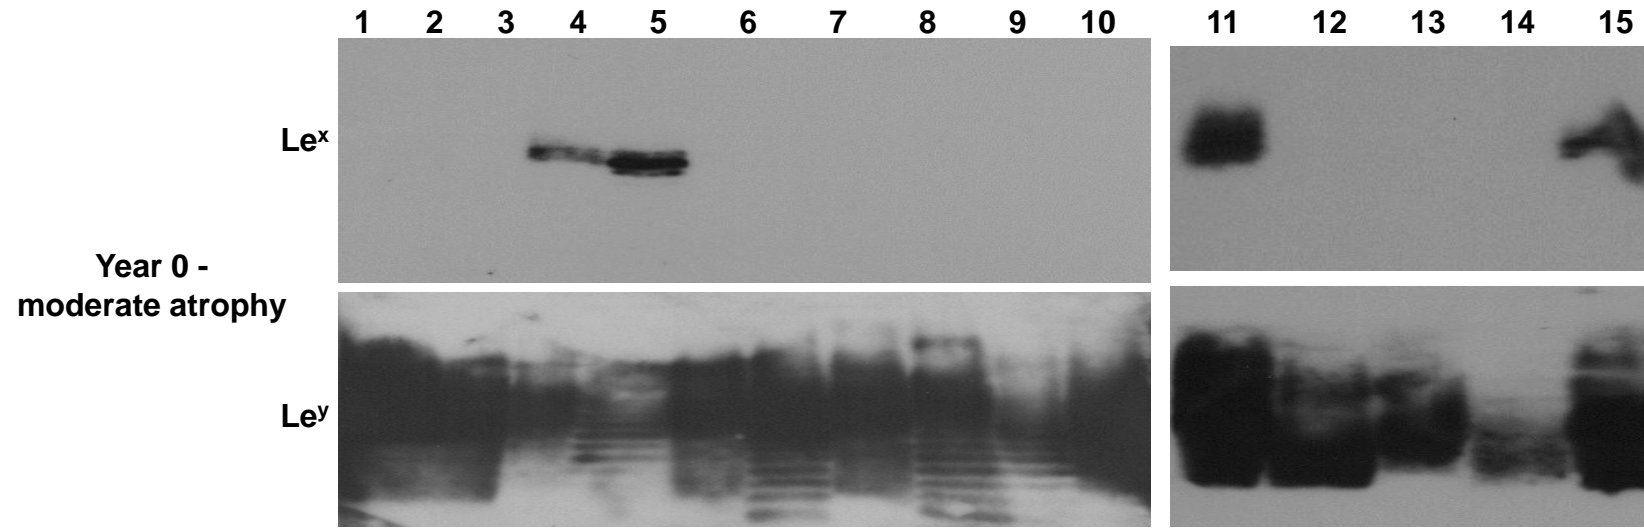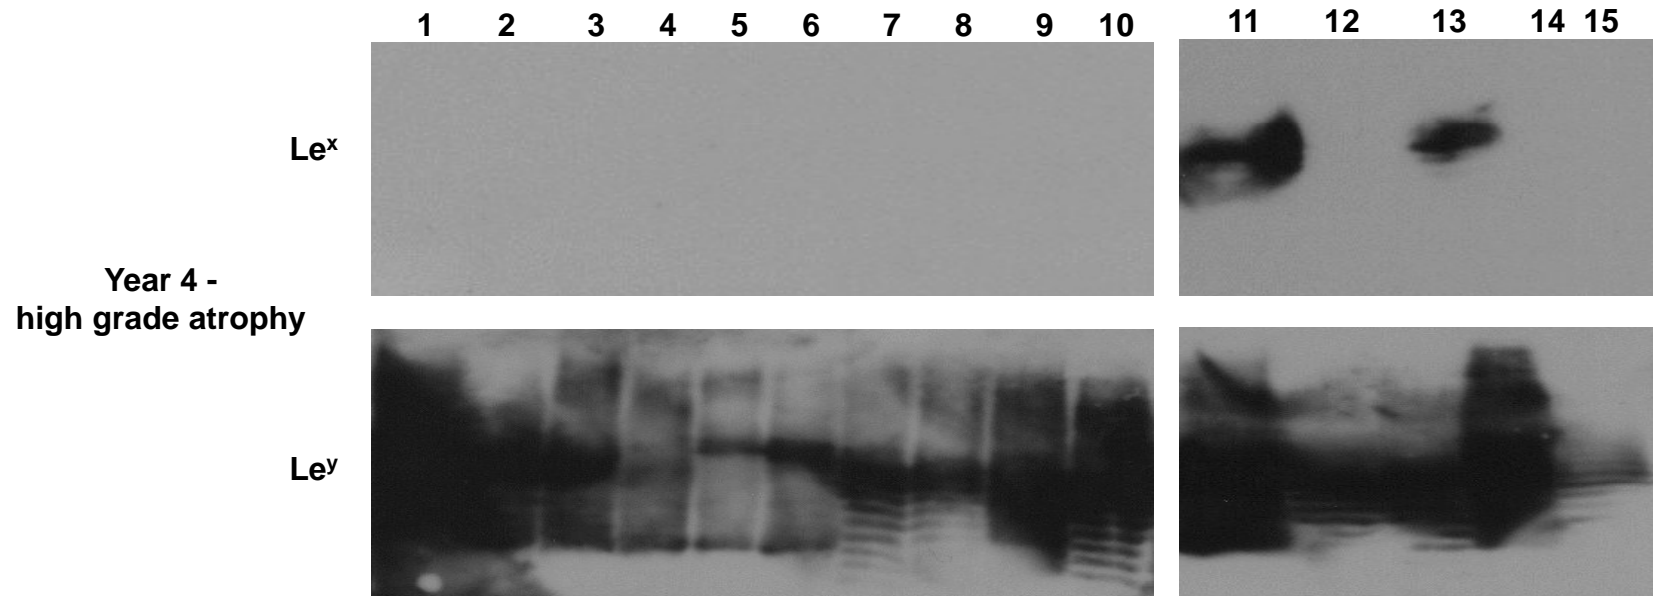

Kx1259

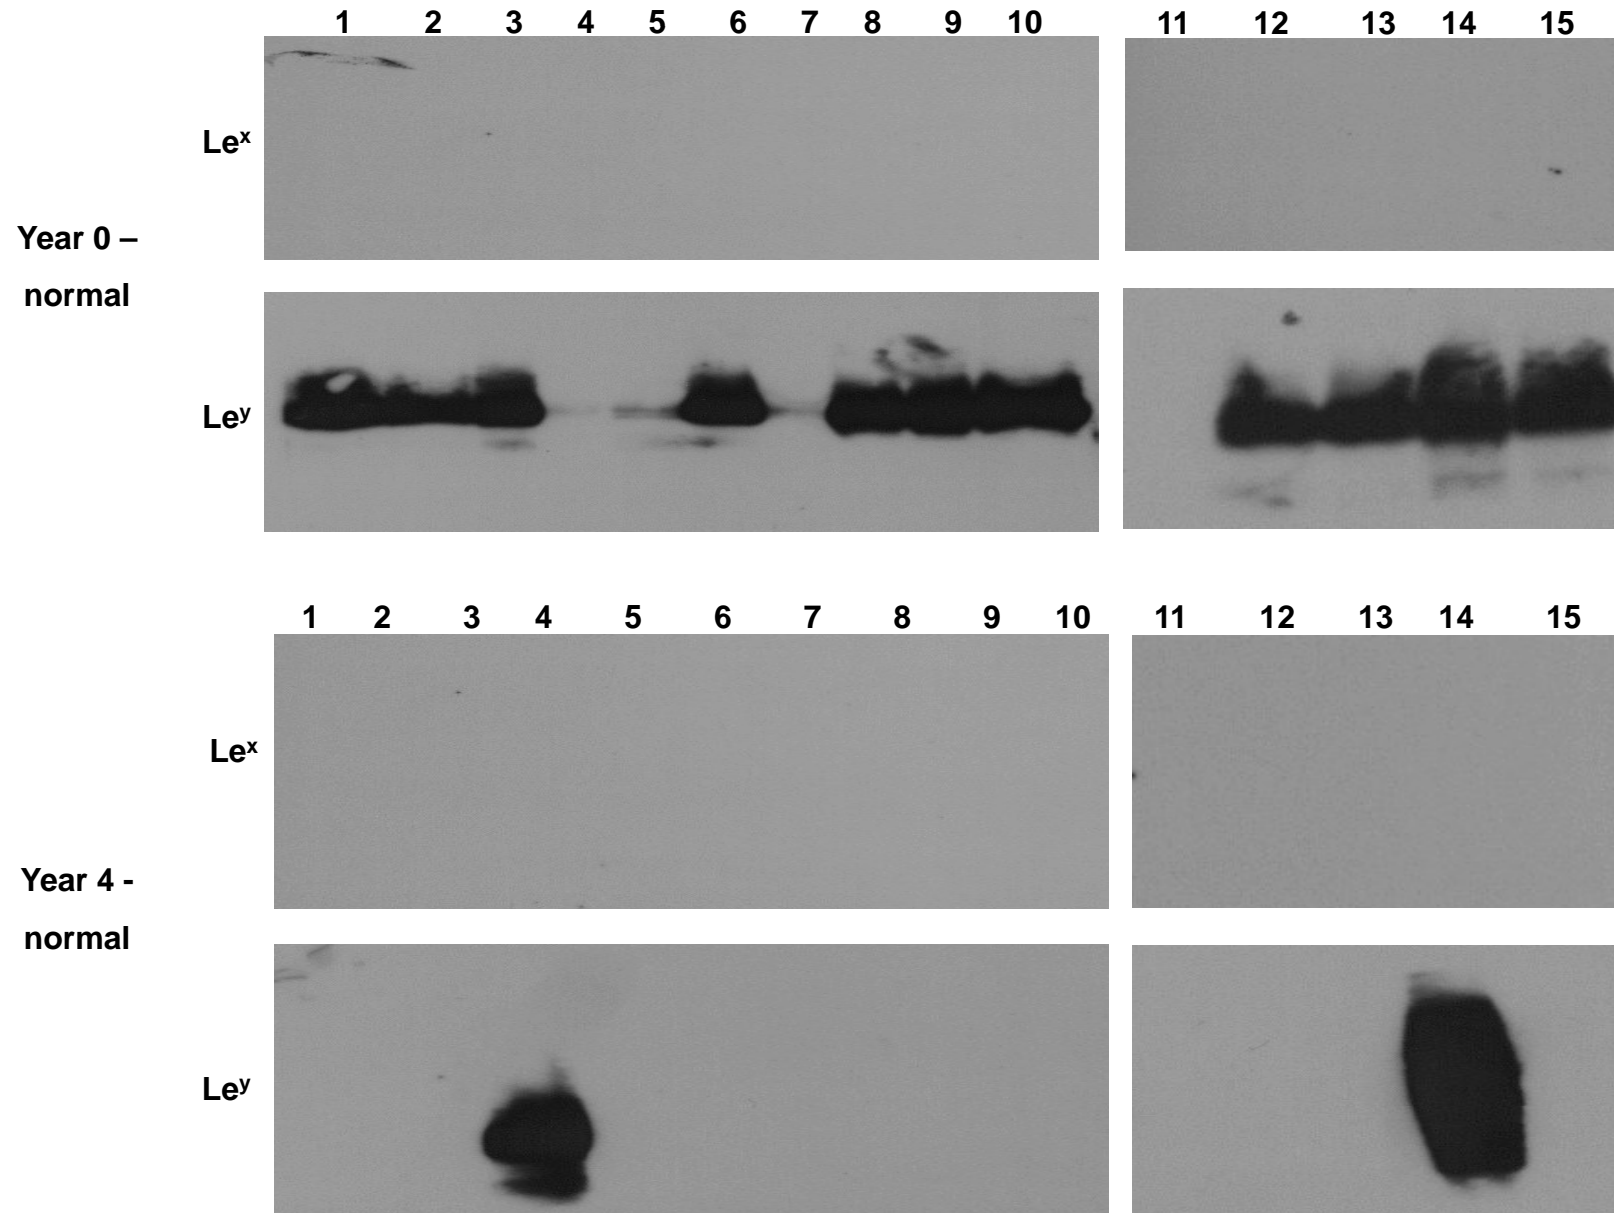

Kx1353

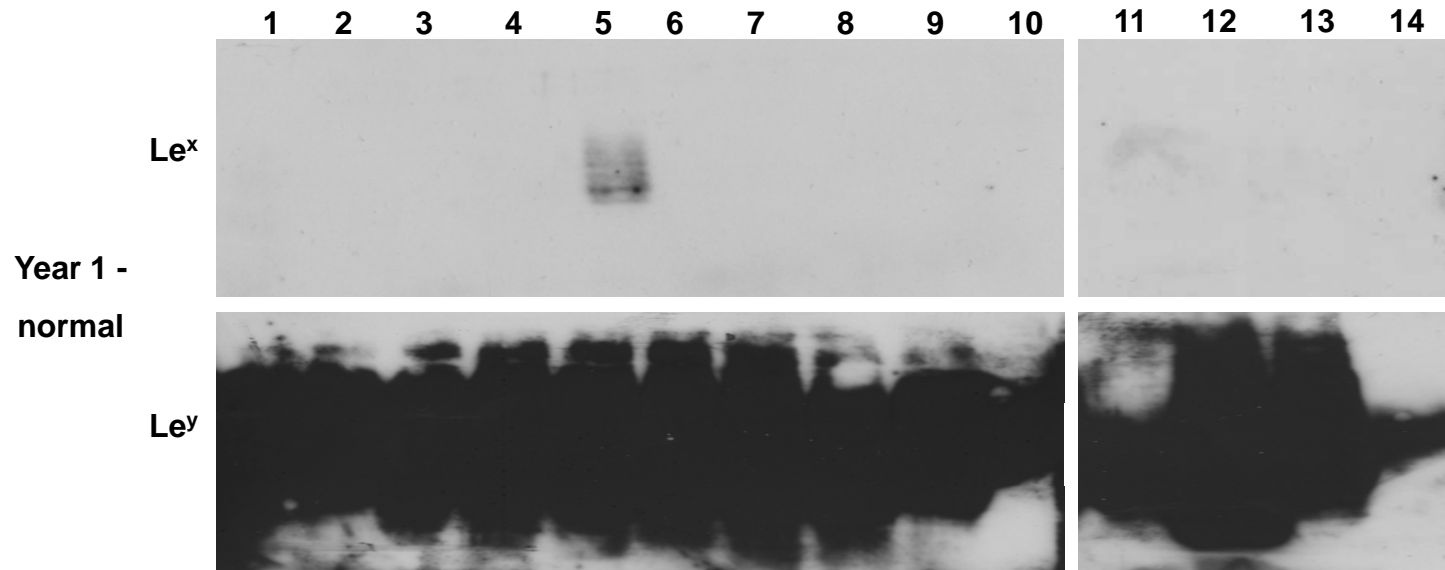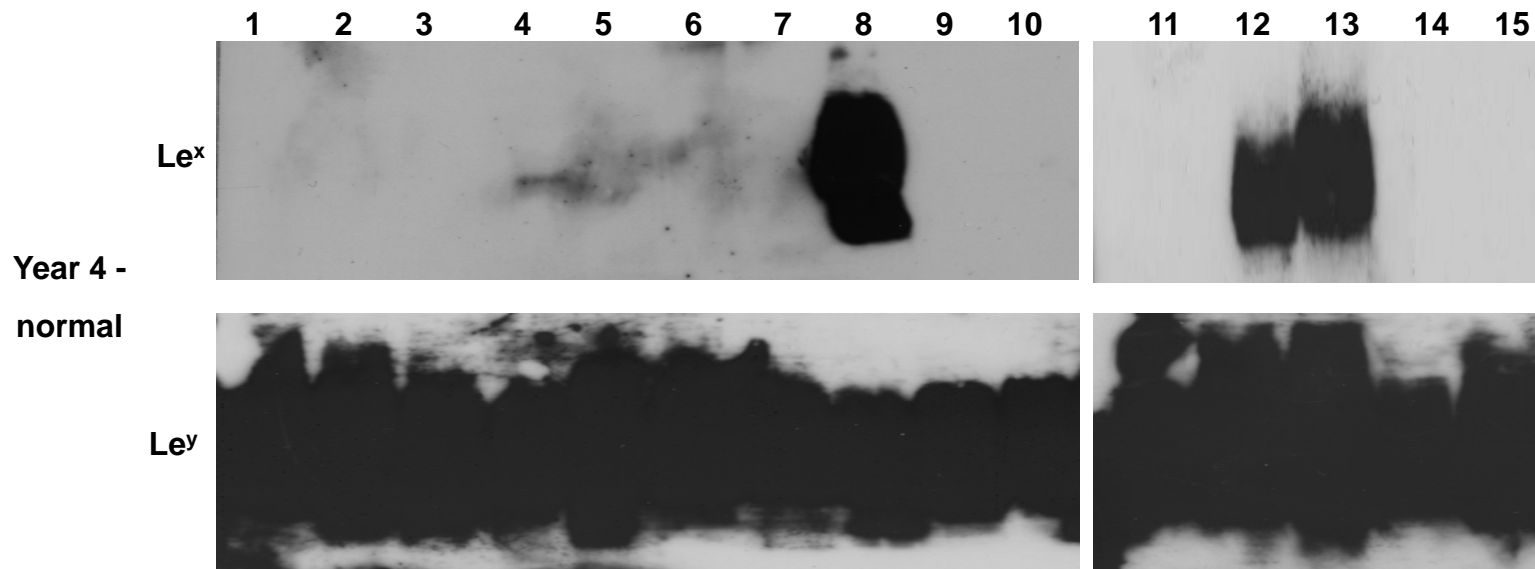

**Fig. S1. Lewis antigen expression in clinical *H. pylori* isolates shows large intra-individual diversity.**

Fifteen single-colony isolates from each individual and time point were obtained. Immunoblot analysis with antibodies detecting Le<sup>x</sup> and Le<sup>y</sup> antigens showed considerable intra-strain diversity of Lewis epitopes within individuals, however the Lewis antigen expression was stable over the four-year period in both normal as well as in atrophic individuals. Lewis antigen expression levels, pattern of Lewis antigen glycosylation and the sizes of O-antigen chains that were fucosylated, also varied among isolates obtained from the same individual. The most common LPS phenotype was Le<sup>y</sup>, either alone, or in combination with Le<sup>x</sup>, whereas the least common was Le<sup>x</sup> exclusively.
